# Supplementary material for: Resource availability and repeated defoliation mediate compensatory growth in trembling aspen (Populus tremuloides) seedlings
Source: PeerJ. 2014 Jul 15;2:e491. doi: 10.7717/peerj.491 (PMC4106189; doi:10.7717/peerj.491)
Supplement: Supplemental Information 1 [file peerj-02-491-s001.xlsx]

## Sheet: Roots
SortingGuide	Treatment	ID	actual sugar	Starch	Total NSC
1	0F	25-1H-R	4.26844	0.15804	4.42648
2	0F	112-1H-R	2.87227	0.142829	3.0151
3	0F	60-1H-R	3.26361	0.37933	3.64294
4	0F	120-1H-R	3.16061	0.171996	3.3326
5	0F	35-1H-R	2.56025	0.204796	2.76505
6	0F	95-1H-R	2.25166	0.185539	2.43719
7	0F	98-1H-R	5.1131	3.00504	8.11814
8	0F	17-1H-R	2.87817	0.299576	3.17775
9	0NF	115-1H-R	4.2951	0.708622	5.00372
10	0NF	2-1H-R	5.12369	0.897722	6.02141
11	0NF	73-1H-R	4.05201	0.223135	4.27514
12	0NF	26-1H-R	5.83353	7.59797	13.4315
13	0NF	136-1H-R	5.67386	0.174812	5.84868
14	0NF	71-1H-R	4.42591	0.242627	4.66854
15	0NF	69-1H-R	3.48928	0.185525	3.67481
16	0NF	88-1H-R	6.48736	2.89281	9.38017
17	25F	97-1H-R	5.35897	0.397758	5.75672
18	25F	109-1H-R	2.82994	0.185163	3.0151
19	25F	125-1H-R	3.46896	0.303836	3.77279
20	25F	57-1H-R	2.48635	0.193657	2.68001
21	25F	141-1H-R	3.83118	0.388545	4.21972
22	25F	131-1H-R	2.83011	0.18799	3.0181
23	25F	106-1H-R	2.24118	0.245081	2.48626
24	25F	111-1H-R	1.11607	0.222664	1.33873
25	25NF	47-1H-R	3.64885	1.59726	5.24611
26	25NF	118-1H-R	5.98641	5.29139	11.2778
27	25NF	104-1H-R	5.52001	2.12597	7.64597
28	25NF	16-1H-R	3.44547	0.357369	3.80283
29	25NF	8-1H-R	2.08645	0.294402	2.38086
30	25NF	59-1H-R	1.93384	0.283065	2.21691
31	25NF	83-1H-R	5.66911	9.28805	14.9572
32	25NF	66-1H-R	4.22734	0.816964	5.0443
33	75 F	122-1H-R	3.01876	0.155731	3.17449
34	75 F	143-1H-R	2.985	0.6377	3.6227
35	75 F	124-1H-R	2.53913	0.253883	2.79302
36	75 F	134-1H-R	1.74953	0.213681	1.96321
37	75 F	31-1H-R	5.08179	1.05861	6.1404
38	75 F	9-1H-R	4.29186	0.14389	4.43575
39	75 F	79-1H-R	2.75606	0.156526	2.91258
40	75 F	94-1H-R	3.50708	0.162374	3.66945
41	75NF	93-1H-R	3.62188	2.34268	5.96456
42	75NF	3-1H-R	6.91108	8.47202	15.3831
43	75NF	4-1H-R	5.62163	8.13473	13.7564
44	75NF	64-1H-R	5.79309	4.49729	10.2904
45	75NF	61-1H-R	5.05435	4.3884	9.44276
46	75NF	108-1H-R	2.2794	0.375649	2.65505
47	75NF	51-1H-R	3.82894	1.00233	4.83127
48	0F	29-2H-R	5.83144	2.3732	8.20464
49	0F	87-2H-R	3.19203	0.144579	3.33661
50	0F	91-2H-R	5.25744	2.95462	8.21206
51	0F	36-2H-R	4.76018	3.32265	8.08283
52	0F	67-2H-R	4.9731	1.38034	6.35344
53	0F	74-2H-R	2.47528	0.173377	2.64866
54	0F	114-2H-R	3.29622	0.893826	4.19004
55	0F	50-2H-R	3.39187	2.32976	5.72163
56	0NF	77-2H-R	6.20887	9.01868	15.2276
57	0NF	70-2H-R	3.5597	7.39013	10.9498
58	0NF	96-2H-R	5.74591	7.83247	13.5784
59	0NF	123-2H-R	8.72443	6.79697	15.5214
60	0NF	78-2H-R	6.65637	6.54268	13.199
61	0NF	56-2H-R	6.26089	4.92534	11.1862
62	0NF	89-2H-R	5.12758	3.00025	8.12783
63	0NF	127-2H-R	4.20226	9.50158	13.7038
64	25F	43-2H-R	6.11863	3.20813	9.32676
65	25F	101-2H-R	1.54323	0.127352	1.67058
66	25F	128-2H-R	4.2048	0.319827	4.52462
67	25F	18-2H-R	2.07511	0.111181	2.18629
68	25F	85-2H-R	5.16532	1.14435	6.30966
69	25F	5-2H-R	2.51374	0.466166	2.9799
70	25F	37-2H-R	4.66975	3.96383	8.63358
71	25F	137-2H-R	2.53448	0.146879	2.68136
72	25NF	44-2H-R	9.16227	14.9591	24.1213
73	25NF	84-2H-R	8.61927	8.22101	16.8403
74	25NF	82-2H-R	8.67239	9.48485	18.1572
75	25NF	92-2H-R	5.5455	7.96128	13.5068
76	25NF	121-2H-R	8.44184	8.75568	17.1975
77	25NF	13-2H-R	6.91425	6.66587	13.5801
78	25NF	45-2H-R	5.7579	8.9971	14.755
79	75 F	52-2H-R	4.5327	3.21852	7.75123
80	75 F	14-2H-R	2.91325	0.157119	3.07037
81	75 F	132-2H-R	4.63785	2.86037	7.49821
82	75 F	11-2H-R	4.07888	1.78611	5.865
83	75 F	75-2H-R	1.78255	0.0893743	1.87192
84	75 F	53-2H-R	5.25653	1.11287	6.3694
85	75 F	19-2H-R	5.75038	1.56529	7.31567
86	75 F	76-2H-R	5.65167	3.51019	9.16187
87	75NF	23-2H-R	8.18266	7.4087	15.5914
88	75NF	21-2H-R	6.06317	3.65517	9.71834
89	75NF	7-2H-R	6.71755	9.73245	16.45
90	75NF	30-2H-R	6.4824	10.206	16.6884
91	75NF	103-2H-R	4.75403	9.44689	14.2009
92	75NF	39-2H-R	7.05088	10.2291	17.28
93	75NF	90-2H-R	5.42025	14.7216	20.1418
94	75NF	48-2H-R	7.55601	8.21851	15.7745
95	0F	40-3H-R	2.41576	1.53696	3.95272
96	0F	130-3H-R	5.31141	4.69786	10.0093
97	0F	42-3H-R	7.23597	7.80829	15.0443
98	0F	99-3H-R	5.09462	6.59476	11.6894
99	0F	32-3H-R	4.93891	3.44339	8.3823
100	0F	28-3H-R	3.32691	2.85087	6.17778
101	0F	62-3H-R	4.01017	5.59457	9.60474
102	0NF	12-3H-R	5.0878	12.2296	17.3174
103	0NF	81-3H-R	7.19843	14.6634	21.8618
104	0NF	102-3H-R	7.64347	9.11658	16.76
105	0NF	10-3H-R	7.11458	11.1406	18.2552
106	0NF	20-3H-R	7.39258	9.03776	16.4303
107	0NF	38-3H-R	6.20265	15.9309	22.1335
108	0NF	46-3H-R	4.77149	11.4644	16.2359
109	25F	72-3H-R	3.55956	5.29028	8.84984
110	25F	129-3H-R	6.7591	3.69219	10.4513
111	25F	24-3H-R	6.35386	8.83115	15.185
112	25F	107-3H-R	5.09143	6.74704	11.8385
113	25F	139-3H-R	2.66289	5.01439	7.67728
114	25F	54-3H-R	3.00597	11.4443	14.4503
115	25F	27-3H-R	3.54699	3.10082	6.64781
116	25F	100-3H-R	4.67763	5.29792	9.97555
117	25NF	142-3H-R	4.84835	10.8729	15.7212
118	25NF	113-3H-R	7.59456	13.1508	20.7454
119	25NF	58-3H-R	6.16052	8.99979	15.1603
120	25NF	6-3H-R	7.81374	13.536	21.3497
121	25NF	116-3H-R	5.9949	14.9468	20.9417
122	25NF	15-3H-R	6.59539	11.0421	17.6375
123	25NF	135-3H-R	6.82951	12.6285	19.458
124	75 F	80-3H-R	6.47838	3.02052	9.4989
125	75 F	41-3H-R	5.94533	8.61659	14.5619
126	75 F	34-3H-R	4.71136	5.96732	10.6787
127	75 F	63-3H-R	5.27571	7.86442	13.1401
128	75 F	86-3H-R	4.39017	8.4376	12.8278
129	75 F	133-3H-R	3.72493	4.14578	7.8707
130	75 F	138-3H-R	3.31949	2.60156	5.92105
131	75 F	140-3H-R	4.58453	11.213	15.7975
132	75NF	65-3H-R	5.91378	12.8344	18.7482
133	75NF	126-3H-R	5.7816	18.9079	24.6895
134	75NF	119-3H-R	4.61222	15.9001	20.5123
135	75NF	55-3H-R	5.28044	13.5889	18.8694
136	75NF	49-3H-R	6.9712	11.912	18.8832
137	75NF	117-3H-R	5.90905	16.0747	21.9837
138	75NF	22-3H-R	7.12955	13.9275	21.057
139	75NF	33-3H-R	5.4179	15.0874	20.5053

## Sheet: Leaves
Treatment	sample	actual sugar	Starch	Total NSC
0F	25-1H-L	16.0854	0.150897	16.2363
0F	112-1H-L	9.32991	0.22909	9.559
0F	60-1H-L	13.0869	0.138181	13.2251
0F	120-1H-L	9.15678	0.143678	9.30046
0F	35-1H-L	9.62097	0.142602	9.76357
0F	95-1H-L	9.63878	0.131219	9.77
0F	98-1H-L	12.9819	0.204568	13.1865
0F	17-1H-L	12.4542	0.157016	12.6112
0NF	115-1H-L	11.3234	0.0642517	11.3877
0NF	2-1H-L	13.3259	0.157773	13.4837
0NF	73-1H-L	11.7054	0.0571252	11.7625
0NF	26-1H-L	13.6559	0.258065	13.914
0NF	136-1H-L	10.2818	0.167538	10.4493
0NF	71-1H-L	12.2096	0.0862248	12.2958
0NF	69-1H-L	8.65098	0.116713	8.7677
0NF	88-1H-L	13.3166	0.342015	13.6587
25F	97-1H-L	13.1315	0.267271	13.3987
25F	109-1H-L	11.274	0.152456	11.4265
25F	125-1H-L	13.5989	0.323846	13.9227
25F	57-1H-L	11.4286	0.163724	11.5924
25F	141-1H-L	12.3885	0.132753	12.5212
25F	131-1H-L	12.3109	0.12	12.4309
25F	106-1H-L	9.98398	0.154091	10.1381
25F	111-1H-L	11.3498	0.120098	11.4699
25NF	47-1H-L	10.8339	0.13369	10.9676
25NF	118-1H-L	9.13203	0.617534	9.74957
25NF	104-1H-L	13.9001	0.173209	14.0734
25NF	16-1H-L	10.7797	0.0828709	10.8625
25NF	8-1H-L	11.5473	0.112725	11.6601
25NF	59-1H-L	10.8669	0.139797	11.0067
25NF	83-1H-L	16.3173	1.07656	17.3938
25NF	66-1H-L	13.9184	0.279653	14.1981
75 F	122-1H-L	13.266	0.364146	13.6302
75 F	143-1H-L	12.3214	0.187553	12.509
75 F	124-1H-L	14.2273	0.465473	14.6928
75 F	134-1H-L	15.0048	0.270831	15.2756
75 F	31-1H-L	15.1409	0.286275	15.4272
75 F	9-1H-L	14.4541	1.09962	15.5538
75 F	79-1H-L	14.0219	0.296631	14.3185
75 F	94-1H-L	13.4681	0.268129	13.7362
75NF	93-1H-L	13.9798	0.106531	14.0863
75NF	3-1H-L	17.0336	2.19608	19.2296
75NF	4-1H-L	17.2272	1.20555	18.4328
75NF	64-1H-L	14.1797	0.330478	14.5102
75NF	61-1H-L	15.1014	0.905756	16.0071
75NF	108-1H-L	10.3606	0.180684	10.5413
75NF	51-1H-L	11.729	0.0837617	11.8128
0F	29-2H-L	11.3848	0.122775	11.5076
0F	87-2H-L	10.9112	0.133907	11.0451
0F	91-2H-L	13.2032	0.0835223	13.2867
0F	36-2H-L	15.0085	0.448068	15.4566
0F	67-2H-L	14.643	0.143619	14.7867
0F	74-2H-L	8.72687	0.122928	8.8498
0F	114-2H-L	12.4596	0.0668003	12.5264
0F	50-2H-L	12.181	0.127088	12.3081
0NF
0NF	70-2H-L	14.2663	0.10861	14.3749
0NF	96-2H-L	12.3852	1.05496	13.4401
0NF	123-2H-L	17.1542	3.2351	20.3893
0NF	78-2H-L	16.3778	1.09725	17.475
0NF	56-2H-L	13.6608	0.554972	14.2158
0NF	89-2H-L	13.836	0.772825	14.6089
0NF	127-2H-L	14.2878	0.191129	14.4789
25F	43-2H-L	9.23392	0.0840897	9.31801
25F	101-2H-L	9.443	0.11796	9.56096
25F	128-2H-L	11.3434	0.0801364	11.4235
25F	18-2H-L	10.8116	0.0890064	10.9006
25F	85-2H-L	9.88559	0.0957299	9.98132
25F	5-2H-L	11.3528	0.0704282	11.4232
25F	37-2H-L	12.9885	0.167364	13.1558
25F	137-2H-L	10.7469	0.130987	10.8779
25NF	44-2H-L	16.4073	0.542573	16.9499
25NF	84-2H-L	14.8952	1.1673	16.0625
25NF	82-2H-L	17.5627	0.969278	18.532
25NF	92-2H-L	14.2205	0.291958	14.5125
25NF	121-2H-L	16.0694	2.29375	18.3631
25NF	13-2H-L	18.2813	1.26279	19.5441
25NF	45-2H-L	15.1409	1.90588	17.0468
75 F	52-2H-L	13.6572	0.143288	13.8005
75 F	14-2H-L	11.6543	0.121679	11.7759
75 F	132-2H-L	8.96126	0.0816993	9.04296
75 F	11-2H-L	12.8247	0.0652316	12.8899
75 F	75-2H-L	13.9732	0.194824	14.168
75 F	53-2H-L	13.2908	0.0784314	13.3692
75 F	19-2H-L	12.8841	0.36506	13.2491
75 F	76-2H-L	12.2568	0.213978	12.4708
75NF	23-2H-L	16.2462	2.00366	18.2499
75NF	21-2H-L	11.6457	0.196827	11.8426
75NF	7-2H-L	15.6675	5.21828	20.8858
75NF	30-2H-L	16.5053	2.5361	19.0414
75NF	103-2H-L	12.0054	0.292398	12.2977
75NF	39-2H-L	14.4659	0.698739	15.1646
75NF	90-2H-L	14.8363	0.312925	15.1492
75NF	48-2H-L	17.1574	2.77996	19.9373
0F	40-3H-L	9.12987	0.073678	9.20355
0F	130-3H-L	9.5834	0.17213	9.75553
0F	42-3H-L	14.9914	0.177265	15.1687
0F	99-3H-L	15.9879	0.355606	16.3435
0F	32-3H-L	11.4017	0.154147	11.5559
0F	28-3H-L	9.84023	0.0955601	9.93579
0F	62-3H-L	11.2962	0.858129	12.1543
0NF	12-3H-L	10.6566	0.637697	11.2943
0NF	81-3H-L	19.7007	1.53602	21.2367
0NF	102-3H-L	14.9075	2.6102	17.5177
0NF	10-3H-L	17.8144	2.61705	20.4314
0NF	20-3H-L	15.4075	2.47518	17.8827
0NF	38-3H-L	15.5533	1.09533	16.6486
0NF	46-3H-L	14.9866	2.76188	17.7485
25F	72-3H-L	10.1446	0.15411	10.2987
25F	129-3H-L	11.3871	0.0631154	11.4502
25F	24-3H-L	9.68372	0.0623512	9.74607
25F
25F	139-3H-L	11.9097	0.0996869	12.0094
25F	54-3H-L	9.32863	0.169317	9.49794
25F	27-3H-L	9.31572	0.0535233	9.36925
25F	100-3H-L	10.3374	0.0541796	10.3916
25NF	142-3H-L	14.4685	1.80609	16.2746
25NF	113--3H-L	12.9615	0.719737	13.6812
25NF	58-3H-L	12.888	0.594862	13.4828
25NF	6-3H-L	12.3257	1.21851	13.5442
25NF	116-3H-L	13.7231	3.72511	17.4482
25NF	15-3H-L	13.7889	1.314	15.1029
25NF	135-3H-L	15.6758	3.62498	19.3008
75 F	80-3H-L	10.5542	0.139251	10.6934
75 F	41-3H-L	10.7588	0.057289	10.8161
75 F	34-3H-L	9.51017	0.074168	9.58434
75 F	63-3H-L	11.4826	0.120385	11.603
75 F	86-3H-L	11.0733	0.097229	11.1705
75 F	133-3H-L	9.20913	0.123224	9.33235
75 F	138-3H-L	13.0157	0.138118	13.1538
75 F	140-3H-L	10.9905	0.0697041	11.0602
75NF	65-3H-L	14.3524	3.40856	17.761
75NF	126-3H-L	13.301	0.609161	13.9101
75NF	119-3H-L	17.3824	1.51204	18.8945
75NF	55-3H-L	14.5858	2.31038	16.8961
75NF	49-3H-L	16.7183	1.67699	18.3953
75NF	117-3H-L	10.6925	0.13835	10.8308
75NF	22-3H-L	17.108	4.47224	21.5802
75NF	33-3H-L	12.5788	1.70723	14.286
