# Supplementary material for: Resource availability and repeated defoliation mediate compensatory growth in trembling aspen (Populus tremuloides) seedlings
Source: PeerJ. 2014 Jul 15;2:e491. doi: 10.7717/peerj.491 (PMC4106189; doi:10.7717/peerj.491)
Supplement: Supplemental Information 2 [file peerj-02-491-s002.xlsx]

## Sheet: Sheet1
sample weight data
ID	first defoliation	second defoliation	third defoliation	forth defoliation	first harvest-leaves	first harvest-stems	first harvest-roots	second harvest-leaves	second harvest-stems	second harvest-roots	third harvest-leaves	third harvest-stems	third harvest-roots
Fertilizer 75%
143	2.818	1.365			5.769	4.873	2.739
134	3.525	2.073			11.074	8.513	2.858
94	4.604	1.481			8.095	5.614	1.808
79	3.952	2.65			11.365	7.968	2.592
31	3.289	0.885			3.86	4.98	1.787
124	3.689	1.147			6.668	5.022	2.22
122	2.365	0.906			4.741	3.638	1.415
9	2.116	0.588			4.202	3.237	1.611
52	2.456	0.325	0.472					6.729	6.638	5.669
14	2.832	1.392	0.668					5.832	8.483	1.975
11	2.755	0.715	0.824					10.35	10.601	4.844
132	3.406	1.602	1.176					11.781	11.571	5.358
53	3.918	1.258	1.557					22.273	26.258	11.469
75	3.11	2.108	0.718					10.402	13.816	4.438
76	3.196	1.025	0.545					7.339	6.622	3.609
19	3.33	1.716	1.546					17.55	14.893	6.349
86	3.995	1.666	2.198	0.921							12.413	17.023	15.338
41	4.141	4.308	0	1.15							20.695	27.617	40.593
80	2.726	0.824	0.653	1.366							9.591	14.398	7.188
138	3.507	0.799	0.46	1.097							8.798	11.309	7.623
34	3.004	2.377	1.546	2.355							17.417	21.818	17.213
63	3.97	2.095	1.253	2.523							19.91	30.576	17.927
133	2.11	0.365	0.623	1.663							9.879	11.775	8.145
140	3.234	1.546	1.282	1.127							9.496	16.686	9.715
Fertilizer 25%
141	0.973	0.618			15.02	9.682	4.426
131	0.713	0.558			8.685	7.123	2.295
106	0.483	0.378			7.596	5.948	1.308
57	0.833	0.559			7.553	6.729	2.05
109	1.224	0.609			8.118	7.142	2.835
111	1.043	0.549			6.511	5.486	2.005
125	1.155	0.529			10.759	8.482	1.687
97	1.15	0.528			14.386	7.858	2.988
5	1.222	1.278	0					24.47	20.043	7.595
137	0.795	0.302	0.346					15.2	10.95	5.007
43	0.88	0.415	0.338					13.211	13.263	7.162
85	0.778	0.301	0.242					7.061	8.014	3.255
37	1.05	0.275	0.338					12.818	12.658	5.029
101	0.701	0.539	0.508					13.665	13.519	3.662
18	0.638	0.208	0.293					9.048	6.49	2.813
128	0.877	0.349	0.451					18.338	13.853	6.815
24	0.815	0.813	0.483	0.343							19.577	23.002	20.704
107	0.83	0.506	0.419	0.548							15.817	19.022	12.621
72	0.872	0.548	0.332	0.278							10.914	17.034	12.208
27	0.889	0.521	0.366	0.312							21.793	16.004	18.658
100	1.023	0.428	0.469	0.52							24.898	27.159	18.686
129	1.223	1.182	0	0.451							30.691	37.101	56.325
139	1.039	0.595	0.511	0.738							19.542	17.257	10.646
54	1.047	0.249	0.432	0.301							5.941	8.796	4.315
Fertilizer 0%
25					9.18	4.808	4.31
60					13.818	8.216	3.246
95					12.348	9.095	3.308
120					3.181	2.189	1.09
35					6.353	3.447	1.221
112					4.303	5.116	2.195
17					9.804	9.465	3.41
98					5.132	5.709	1.873
91								24.781	15.943	7.773
36								17.814	14.367	7.26
74								22.952	22.199	6.003
67								10.212	12.406	3.436
29								10.696	9.631	4.472
114								25.56	25.187	11.155
87								8.936	7.966	3.426
50								17.623	14.496	5.429
28											14.267	10.675	10.809
40											27.873	30.563	26.806
42											30.809	30.142	27.248
32											32.743	30.466	19.547
62											17.001	19.108	10.609
130											18.951	23.018	11.398
99											19.374	18.363	11.158
No Fertilizer 75%
3	3.726	1.455			8.569	8.944	3.685
64	3.556	1.886			7.079	7.442	2.661
93	3.575	1.412			6.871	7.223	3.218
110	4.615	0.347
51	3.2	1.869			4.959	4.526	1.956
108	2.666	0.86			4.432	3.902	1.99
61	2.896	2.126			6.186	5.678	1.935
4	3.015	1.741			7.513	6.648	4.418
21	2.232	0.108	0.608					4.524	5.642	2.823
103	3.238	0.999	1.102					5.875	8.946	3.633
23	4.681	1.315	0.732					10.835	10.82	5.671
90	3.22	1.094	0.971					8.206	10.185	9.755
39	4.091	1.472	1.366					11.27	17.203	6.392
7	2.181	0.651	0.402					3.751	3.72	2.756
48	1.906	0.647	0.436					3.472	3.796	3.561
30	4.335	2.222	1.03					9.518	12.526	6.398
22	2.996	0.78	0.593	0.28							5.655	7.408	7.078
49	2.613	0.866	0.873	0.349							7.422	11.125	7.836
119	5.863	3.182	0.817	0.466							12.971	17.671	24.409
126	3.372	1.672	0.905	0.538							8.951	13.505	9.531
65	2.685	1.478	0.663	0.363							8.982	13.05	7.411
55	2.574	0.84	0.636	0.324							6.154	8.057	7.153
117	2.907	1.923	0.797	0.455							6.049	8.856	6.973
33	2.558	0.385	0.629	0.167							5.892	5.647	4.433
No Fertilizer 25%
1	0.969
83	1.468	0.707			13.003	10.272	6.991
8	1.363	0.27			7.813	4.085	1.202
16	0.738	0.433			4.537	3.534	1.211
59	0.768	0.315			4.112	4.229	1.248
47	0.988	0.393			6.807	6.981	2.099
66	1.118	0.339			4.368	4.447	1.309
104	1.615	0.84			17.052	12.903	4.697
118	1.036	0.703			11.167	6.968	3.596
45	1.265	0.402	0.148					11.155	10.566	4.731
13	1.013	0.406	0.365					15.055	18.823	6.518
121	0.809	0.208	0.061					6.006	5.611	2.942
82	1.088	0.559	0.222					11.279	13.866	4.412
92	1.228	0.853	0.109					16.672	15.415	7.905
84	0.642	0.218	0.054					10.109	9.815	3.849
44	1.202	0.712	0.17					18.231	13.387	8.986
116	0.453	0.505	0.036	0.108							7.682	6.637	6.464
142	1.498	0.609	0.457	0.155							21.12	21.859	28.821
113	1.089	0.686	0.258	0.139							7.4	12.501	6.135
58	1.593	0.633	0.686	0.669							19.051	24.028	15.403
15	0.763	0.444	0.45	0.325							12.647	3.757	10.163
135	0.855	0.024	0.088	0.322							14.913	12.929	8.333
6	0.536	0.22	0.033	0.123							11.187	12.084	15.525
No Fertilizer 0%
26					22.264	12.897	9.041
73					5.035	3.448	1.783
71					5.405	2.471	1.831
136					4.295	2.372	1.423
115					8.465	4.772	2.532
69					5.598	3.274	1.321
2					6.153	4.062	1.779
88					10.609	8.044	4.49
70								20.432	18.988	8.787
127								19.732	19.032	16.575
77								14.582	12.691	9.33
56								18.893	17.857	8.796
78								11.136	9.534	5.638
96								21.62	18.648	17.179
123								14.69	11.213	5.303
89								12.276	11.399	7.205
20											29.198	31.932	45.755
81											15.611	13.347	13.375
12											31.529	34.489	41.028
10											10.592	10.97	7.272
46											23.987	24.212	40.334
38											15.728	22.657	16.311
102											21.762	21.827	14.62
